# Supplementary material for: Biosorption of anionic and cationic dyes via raw and chitosan oligosaccharide-modified Huai Flos Chrysanthemum at different temperatures
Source: PubMed Central journal article supplement — RSC Adv. 2019 Apr 10;9(20):11202–11. doi: 10.1039/c9ra00378a (PMC9063026; doi:10.1039/c9ra00378a), 2019-04-10
Supplement: RA-009-C9RA00378A-s001.pdf [file RA-009-C9RA00378A-s001.pdf]

***Prominent biosorption of anionic and cationic dyes via raw and chitosan oligosaccharide-modified Huai Flos Chrysanthemum at different condition***<sup>☆1</sup>

**Yanzhuo Zhang<sup>a\*</sup>, Jing Zhao<sup>b</sup>, Jun Li<sup>c</sup>**

<sup>a</sup>*School of Environment, Henan Normal University, Key Laboratory for Yellow River and Huai River Water Environmental and Pollution Control, Ministry of Education, Henan Key Laboratory for Environmental Pollution Control, Xinxiang, Henan 453007, P. R. China.*

<sup>b</sup>*School of Chemistry and Chemical Engineering, Henan Normal University, Xinxiang, Henan 453007, P. R. China.*

<sup>c</sup>*The College of Architecture and Civil Engineering, The Key Laboratory of Beijing for Water Quality Science & Water Environment Recovery Engineering, Beijing University of Technology, Beijing 100124, China*

Yanzhuo Zhang\*: (Corresponding authors. E-mail: 83995983@qq.com)

Authors:

Yanzhuo Zhang. E-mail: 83995983@qq.com

Jing Zhao. E-mail: 124236932@qq.com

Jun Li. E-mail: lijunbjut@163.com

---

☆Supported by the Youth Science Foundation of Henan normal university (2017QK22); the PhD established project of Henan normal university (5101219170125).

\*Corresponding author. Tel: +86 3325971; E-mail: 83995983@qq.com

## **TEXT, Figure and Table Captions**

**Fig. S1 Image of (a) raw HFC, (b) HFC@CO, (c-e) HFC@CO after adsorption**

**Fig. S2 SEM analysis**

**Fig. S3 FTIR spectra of biosorbents: (a) HFC, (b) HFC@CO and (c) HFC@CO after adsorption of dyes**

**Fig. S4 TG analysis for HFC and HFC@CO**

**Table S1 The BET and BJH analysis of raw diatomite and DE@C**

**TEXT S1 The representation of adsorption equilibrium equations in batch adsorption**

**TEXT S2 The representation of kinetics equilibrium equations in batch adsorption**

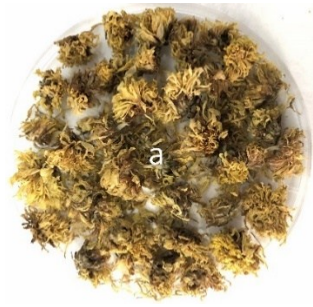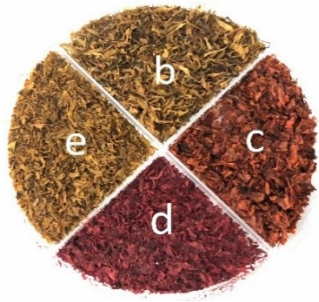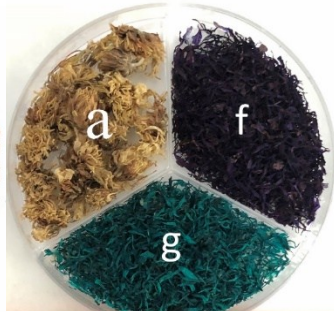

**Fig. S1 Image of (a) raw HFC, (b) HFC@CO, (c-e) HFC@CO after adsorption**

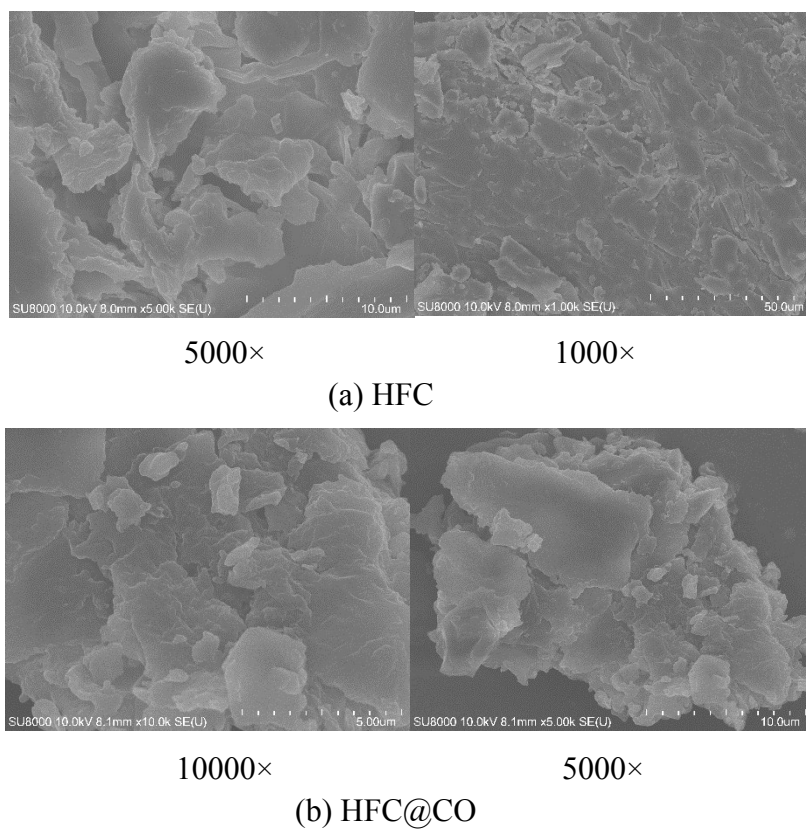

**Fig. S2 SEM analysis**

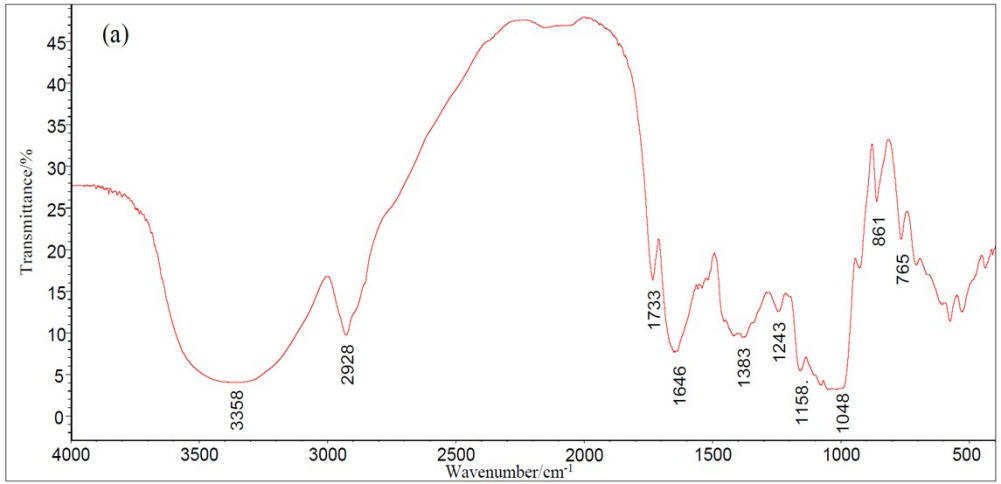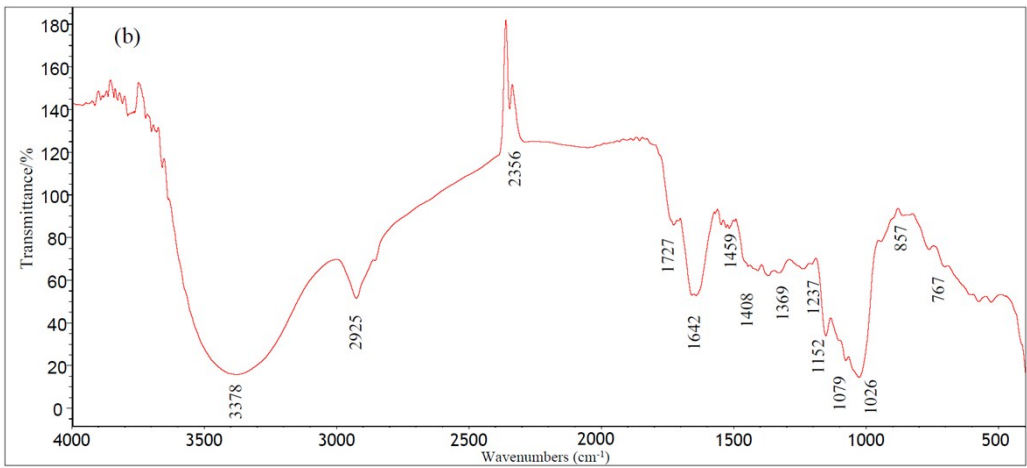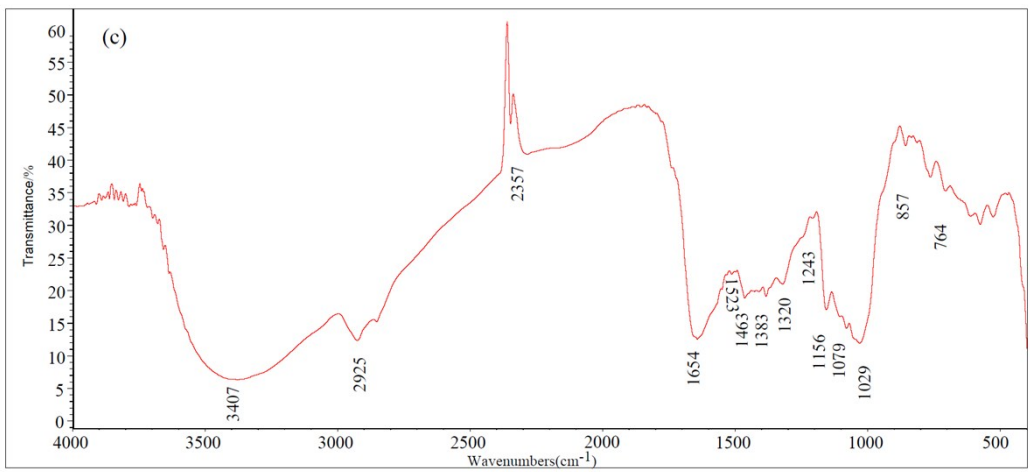

**Fig. S3 FTIR spectra of biosorbents: (a) HFC, (b) HFC@CO and (c) HFC@CO after adsorption of dyes**

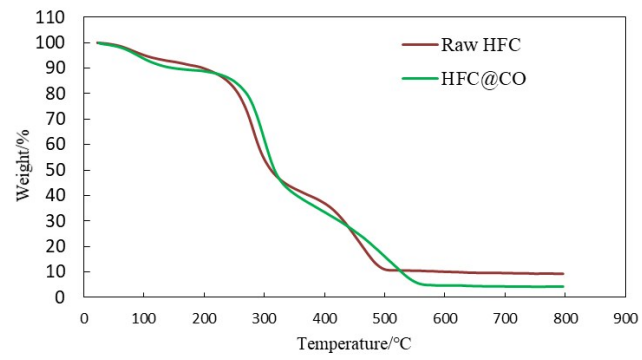

**Fig. S4 TG analysis for HFC and HFC@CO**

**Table S1 The BET and BJH analysis of raw diatomite and DE@C**

| Name    | BET/ $\text{m}^2 \cdot \text{g}^{-1}$ | Average pore/nm | Total pore volume/ $\text{cm}^3 \cdot \text{g}^{-1}$ | $\text{N}_2$ adsorption/desorption |
|---------|---------------------------------------|-----------------|------------------------------------------------------|------------------------------------|
| Raw HFC | 47.67                                 | 21.63           | 0.4919                                               | Type IV                            |
| HFC@CO  | 40.17                                 | 18.61           | 0.4398                                               |                                    |

## TEXT S1 The representation of adsorption equilibrium equations in batch adsorption

The assumed prerequisite of Langmuir Adsorption Isotherm is that: the surfaces of the biosorbent are even and consist of monomolecular layer; and no interaction force exists between the adsorbed molecules.

$$\frac{1}{q_e} = \frac{1}{q_m} + \frac{1}{C_e \times b \times q_m} \quad (7)$$

In this case,  $C_e$  is the liquid-phase dye concentration at equilibrium, mg/L;  $q_e$  is the equilibrium adsorption capacity of the biosorbent, mg/g;  $q_m$  is the maximum adsorbing capacity, mg/g;  $b$  refers to Langmuir constant, L/mg.

Freundlich Adsorption Isotherm is an empirical equation to describe heterogeneous systems and adsorption capacity is based on the concentration of dyes at equilibrium. This isotherm is given in the following equation:

$$\ln q_e = \ln K_F - \frac{1}{n} \ln C_e \quad (8)$$

In this case;  $K_F$  is the Freundlich constant,  $(\text{mg/g}) \cdot (\text{L/mg})^{1/n}$ , which related to the adsorption capacity. If  $0 < n^{-1} < 1$ , the adsorption process is available and works well.



**TEXT S2 The representation of kinetics equilibrium equations in batch adsorption**

Pseudo-First-Order Kinetic Model was expressed as follows:

$$\log(q_e - q_t) = \log q_{e1} - \frac{k_1 t}{2.303} \quad (9)$$

where  $q_e$  is the experimental equilibrium adsorption capacity of the biosorbent, mg/g;  $q_t$  is the adsorption capacity during period  $t$ , mg/g;  $q_{e.cal}$  is the theoretical equilibrium adsorption capacity, mg/g;  $k_1$  is the Pseudo-First-Order Kinetic Model constant, 1/min.

Pseudo-second order kinetic model can be used into deep analysis of kinetic data.

The model is expressed as:

$$\frac{t}{q_t} = \frac{1}{k_2 q_e^2} + \frac{t}{q_e} \quad (10)$$

Where  $k_2$  is the Pseudo-Second-Order Kinetic Model constant, g/(mg·min).
